# Supplementary material
Source: Springer Nature journal article supplement (https://www.springermedizin.de/resource/supplementary/13058_2009_2439_MOESM1_ESM.pdf/9701420)

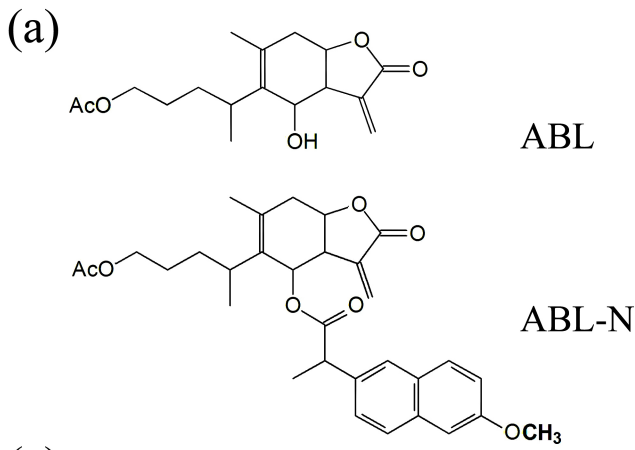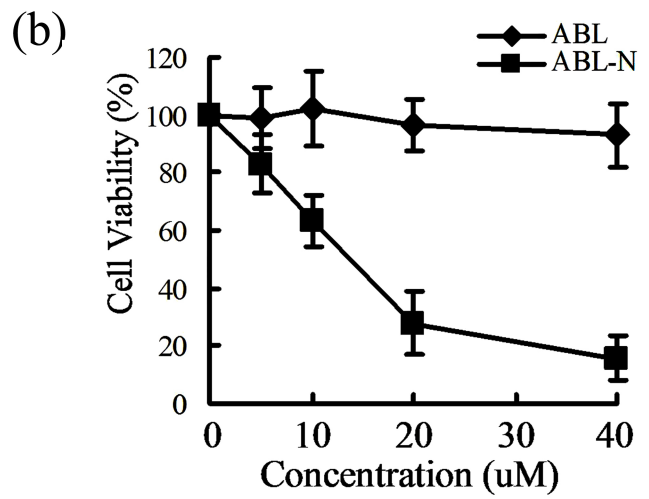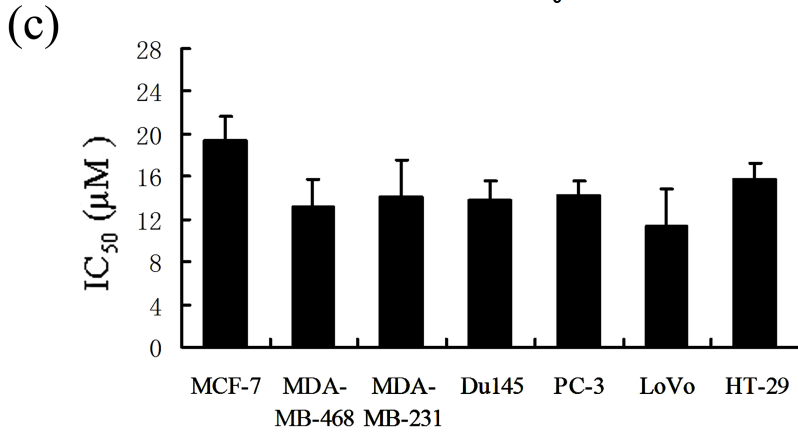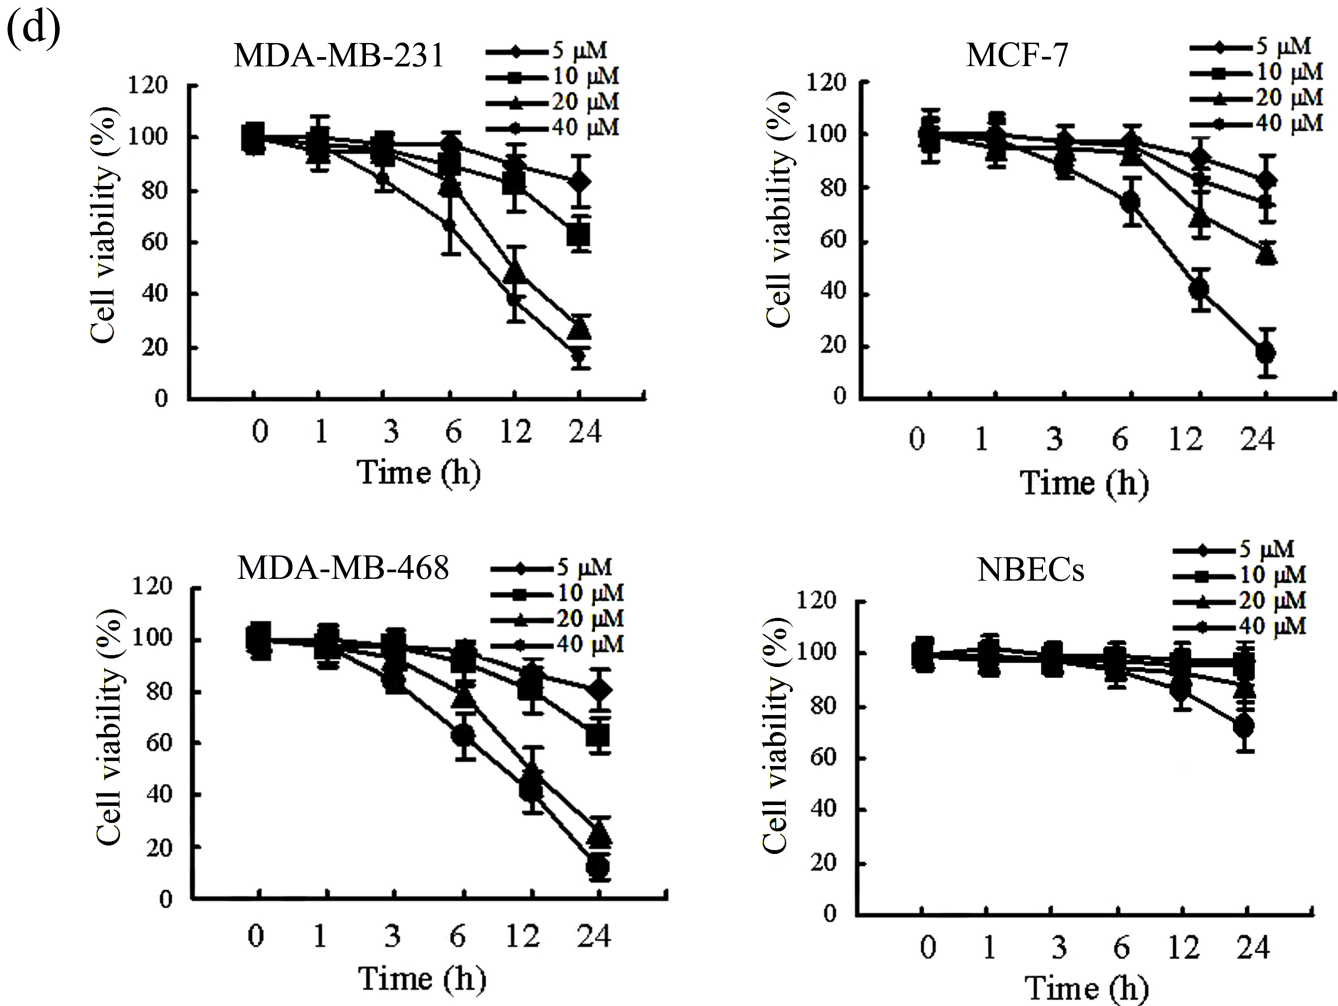

Supplement: MOESM1 [file 9701420]
